# Supplementary figures and images for: Photophysical study of photoinduced electron transfer in a bis-thiophene substituted peryleneimide
Source: Royal Society of Chemistry journal article supplement (doi:10.1039/b409346c), 2004-11-09

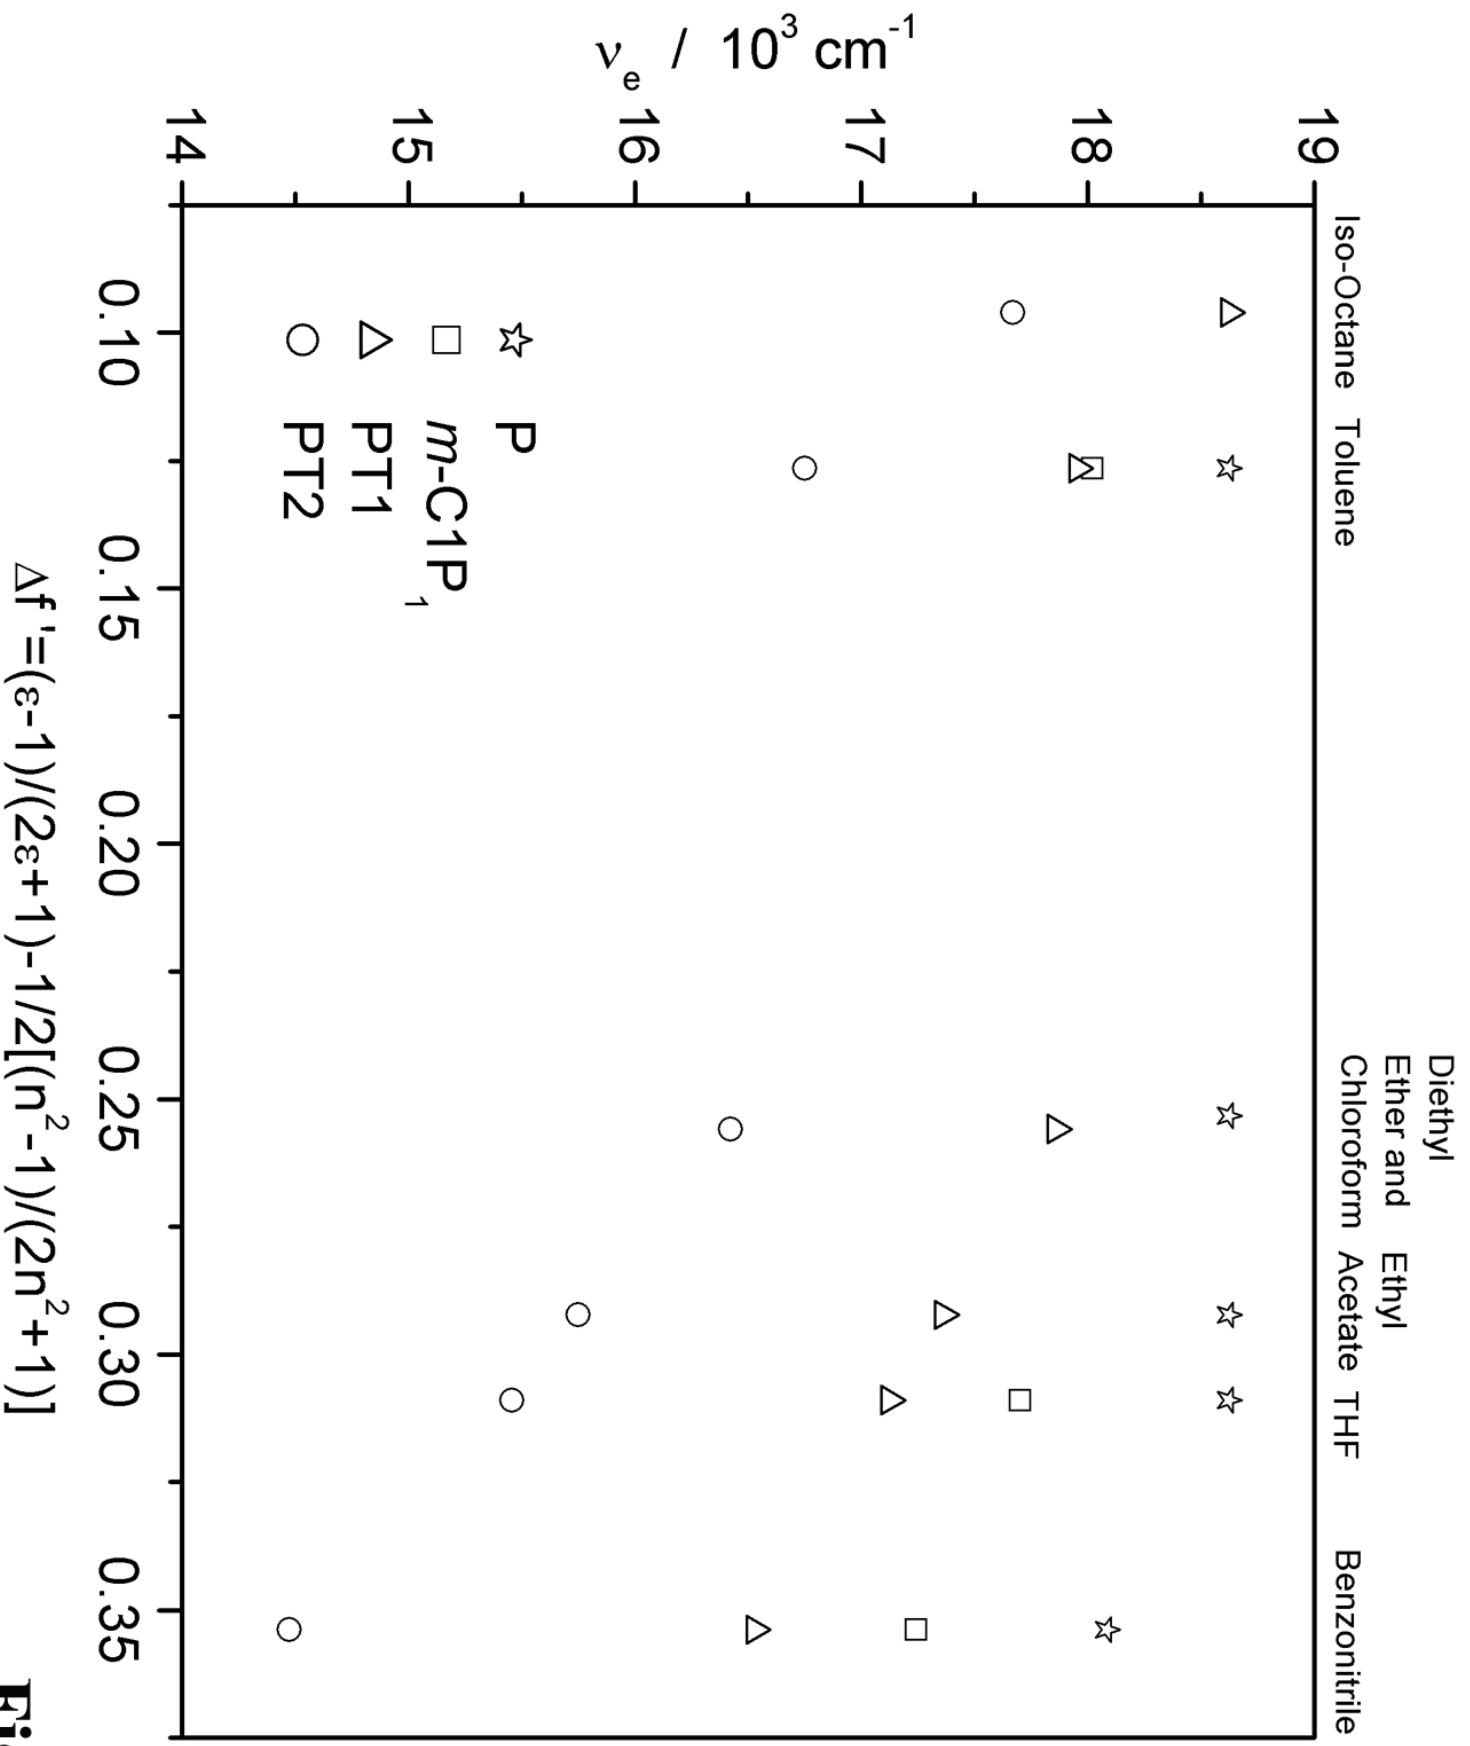

**Figure A**

Log Counts

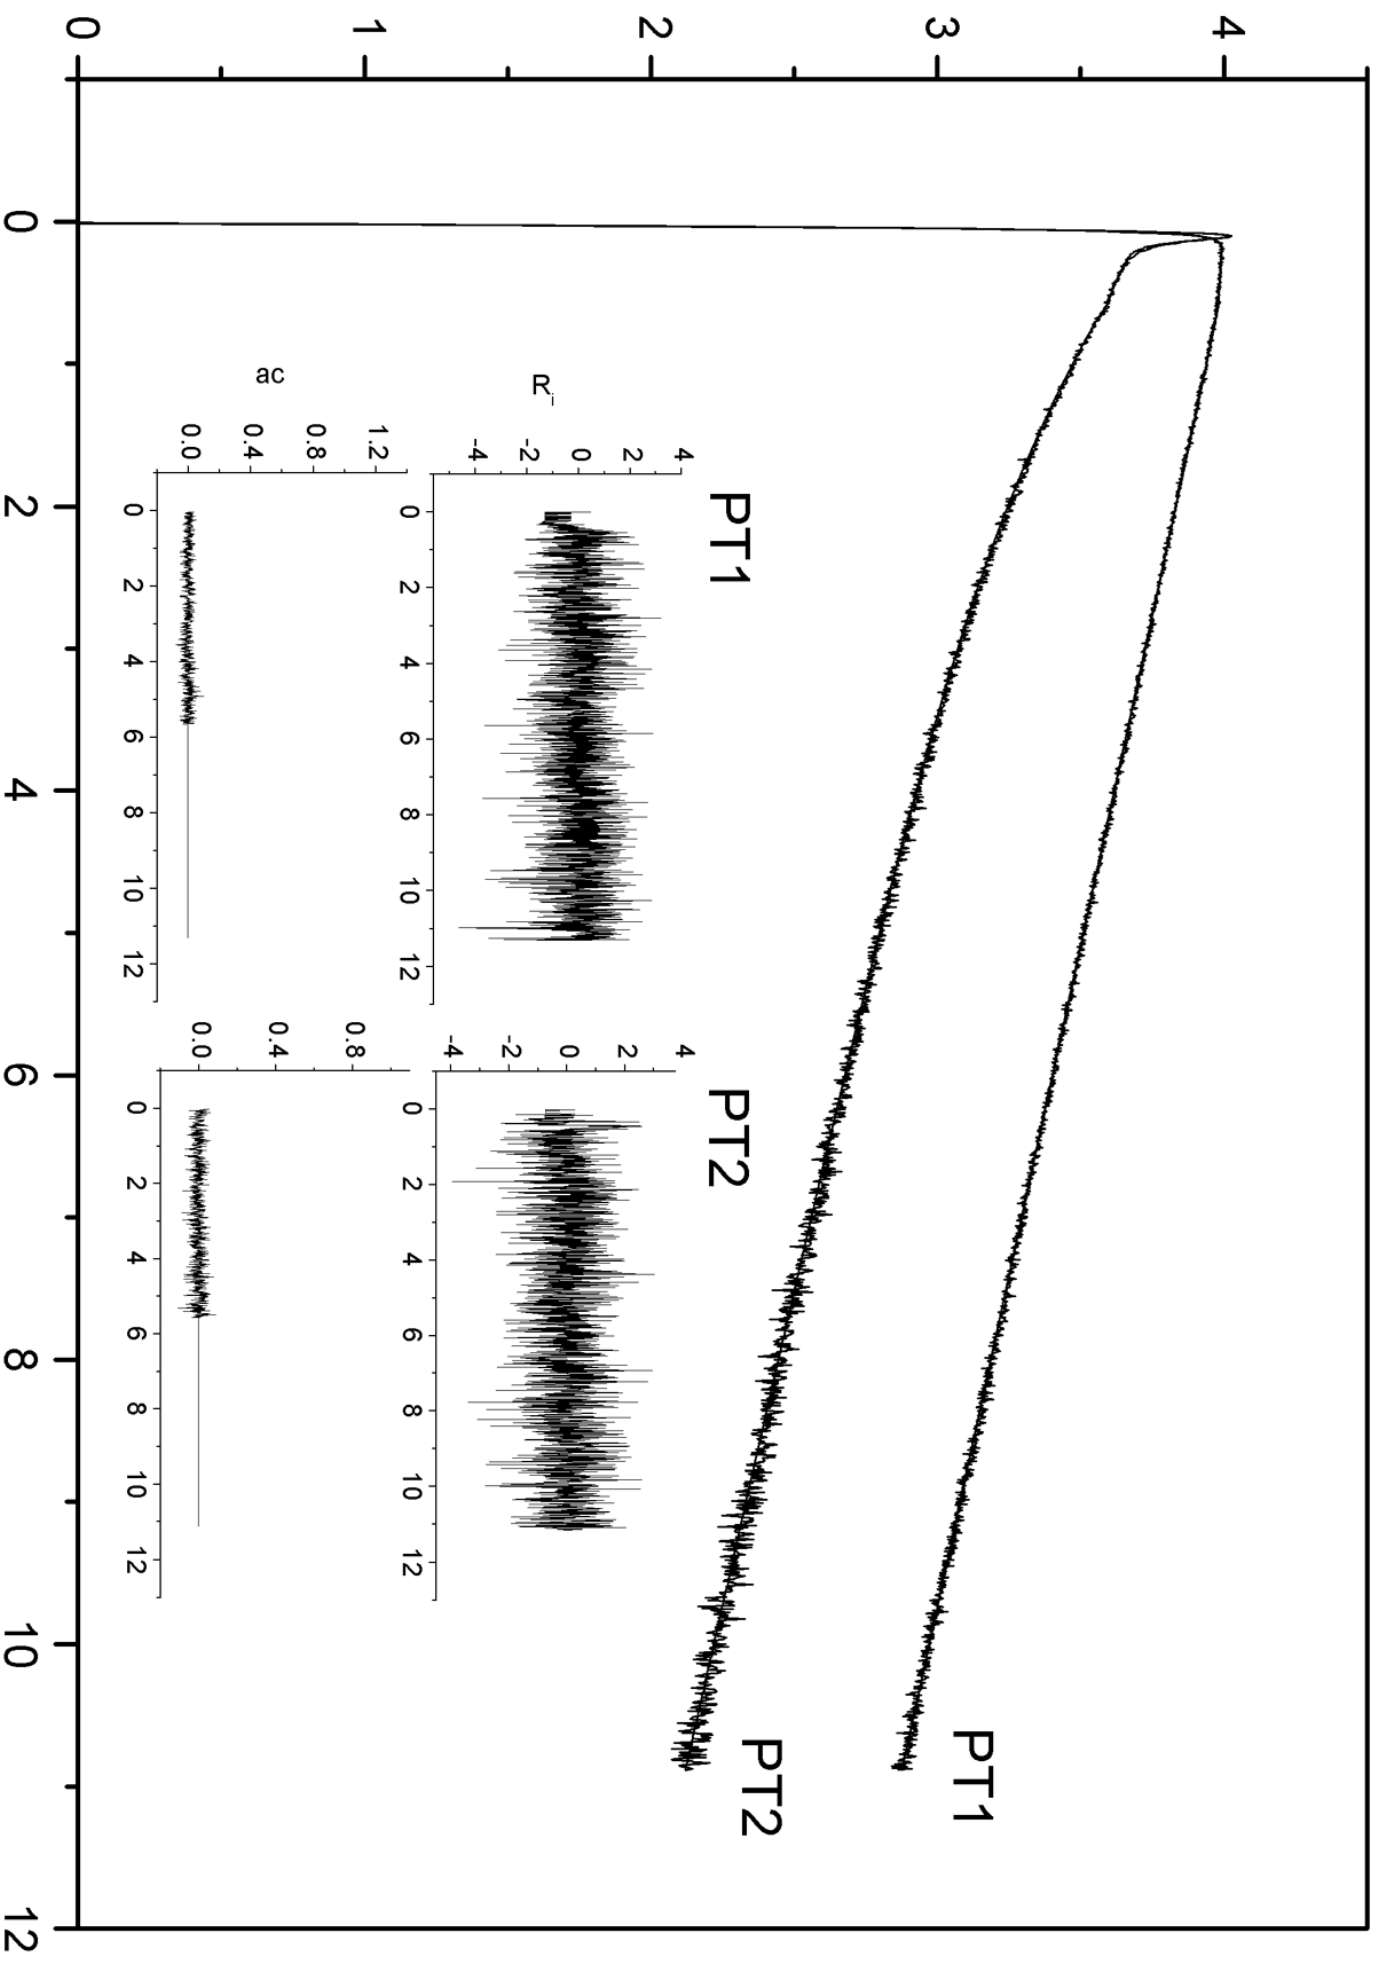

Delay Time / ns

Figure B

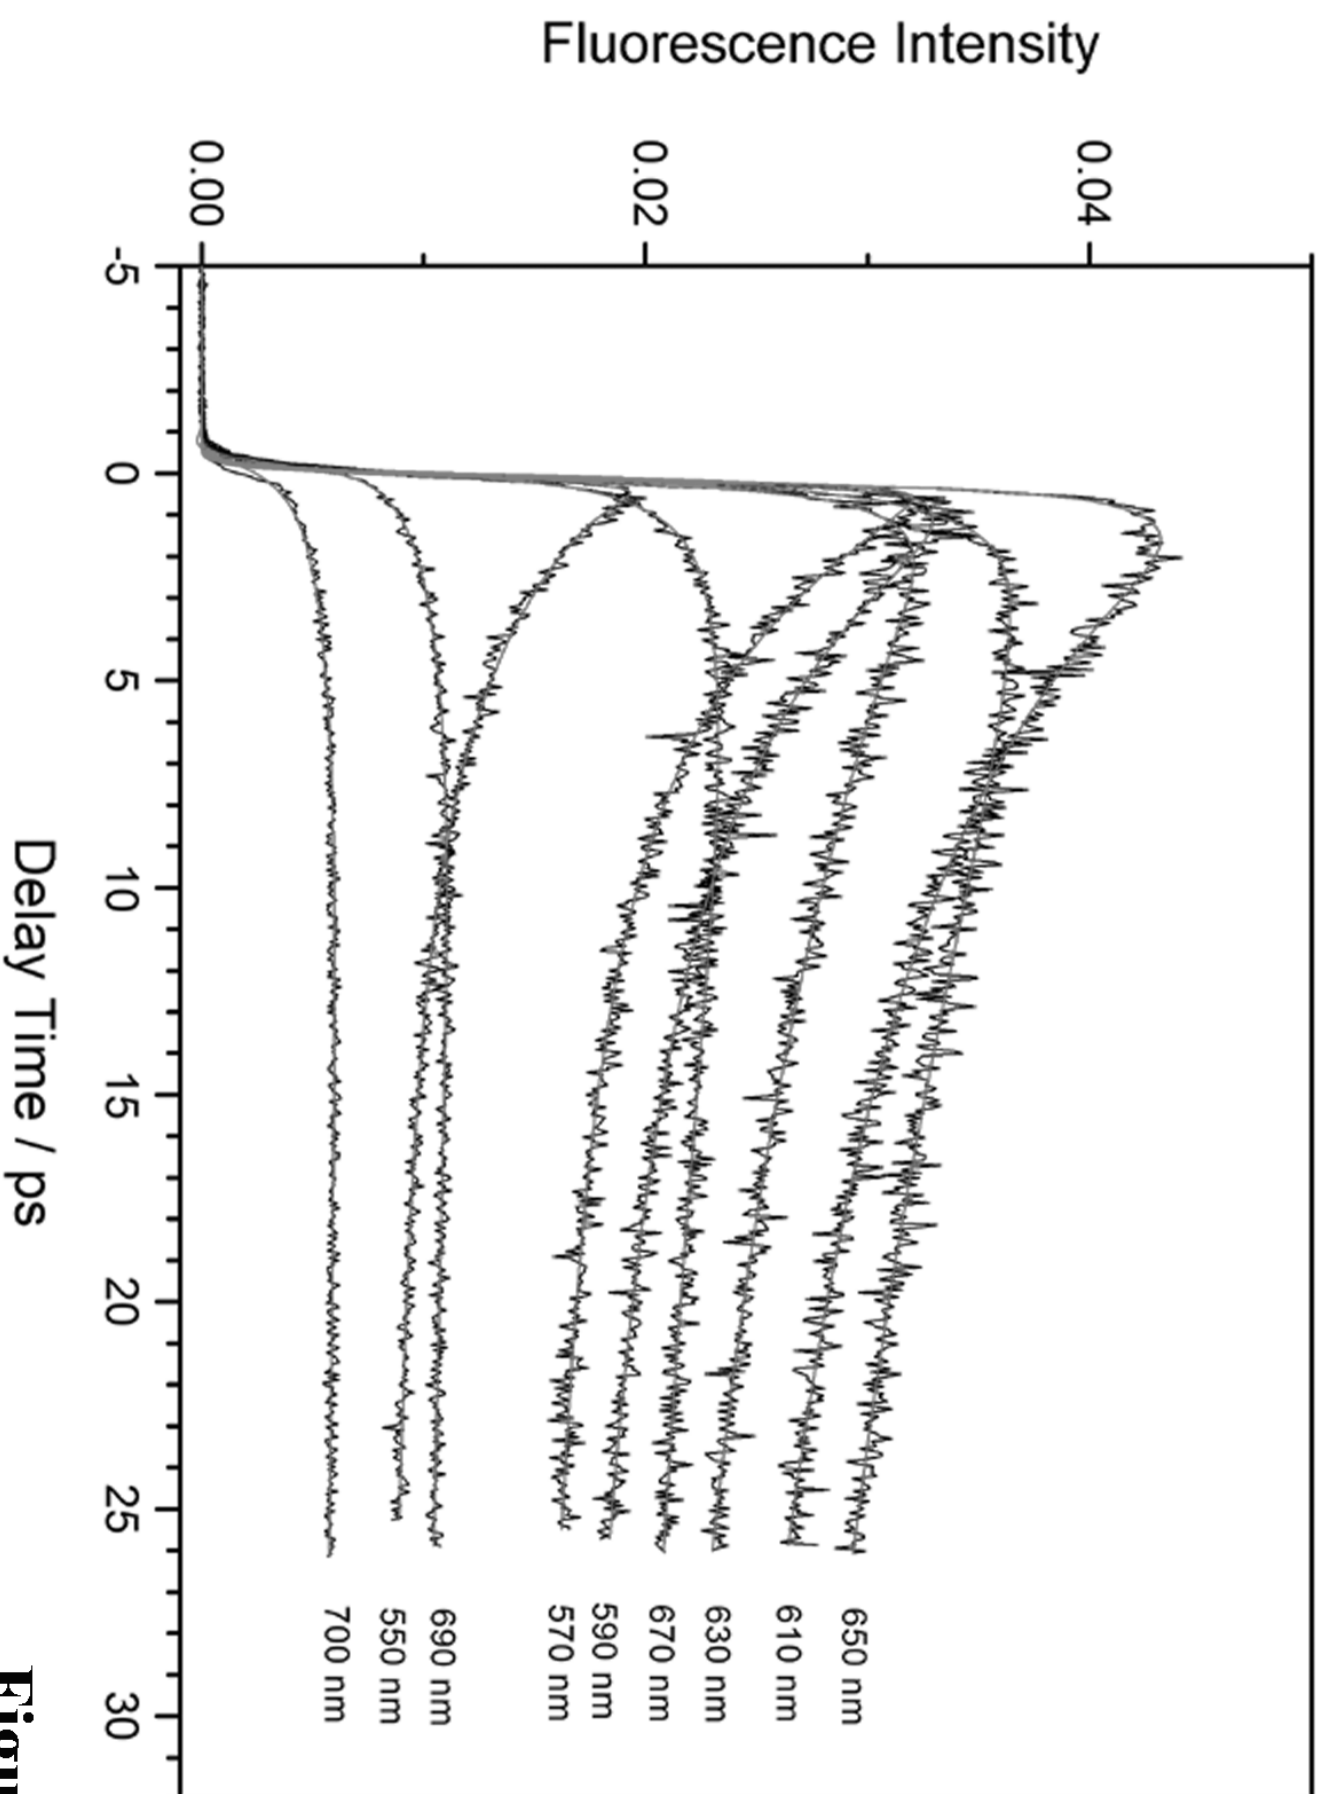

Figure C

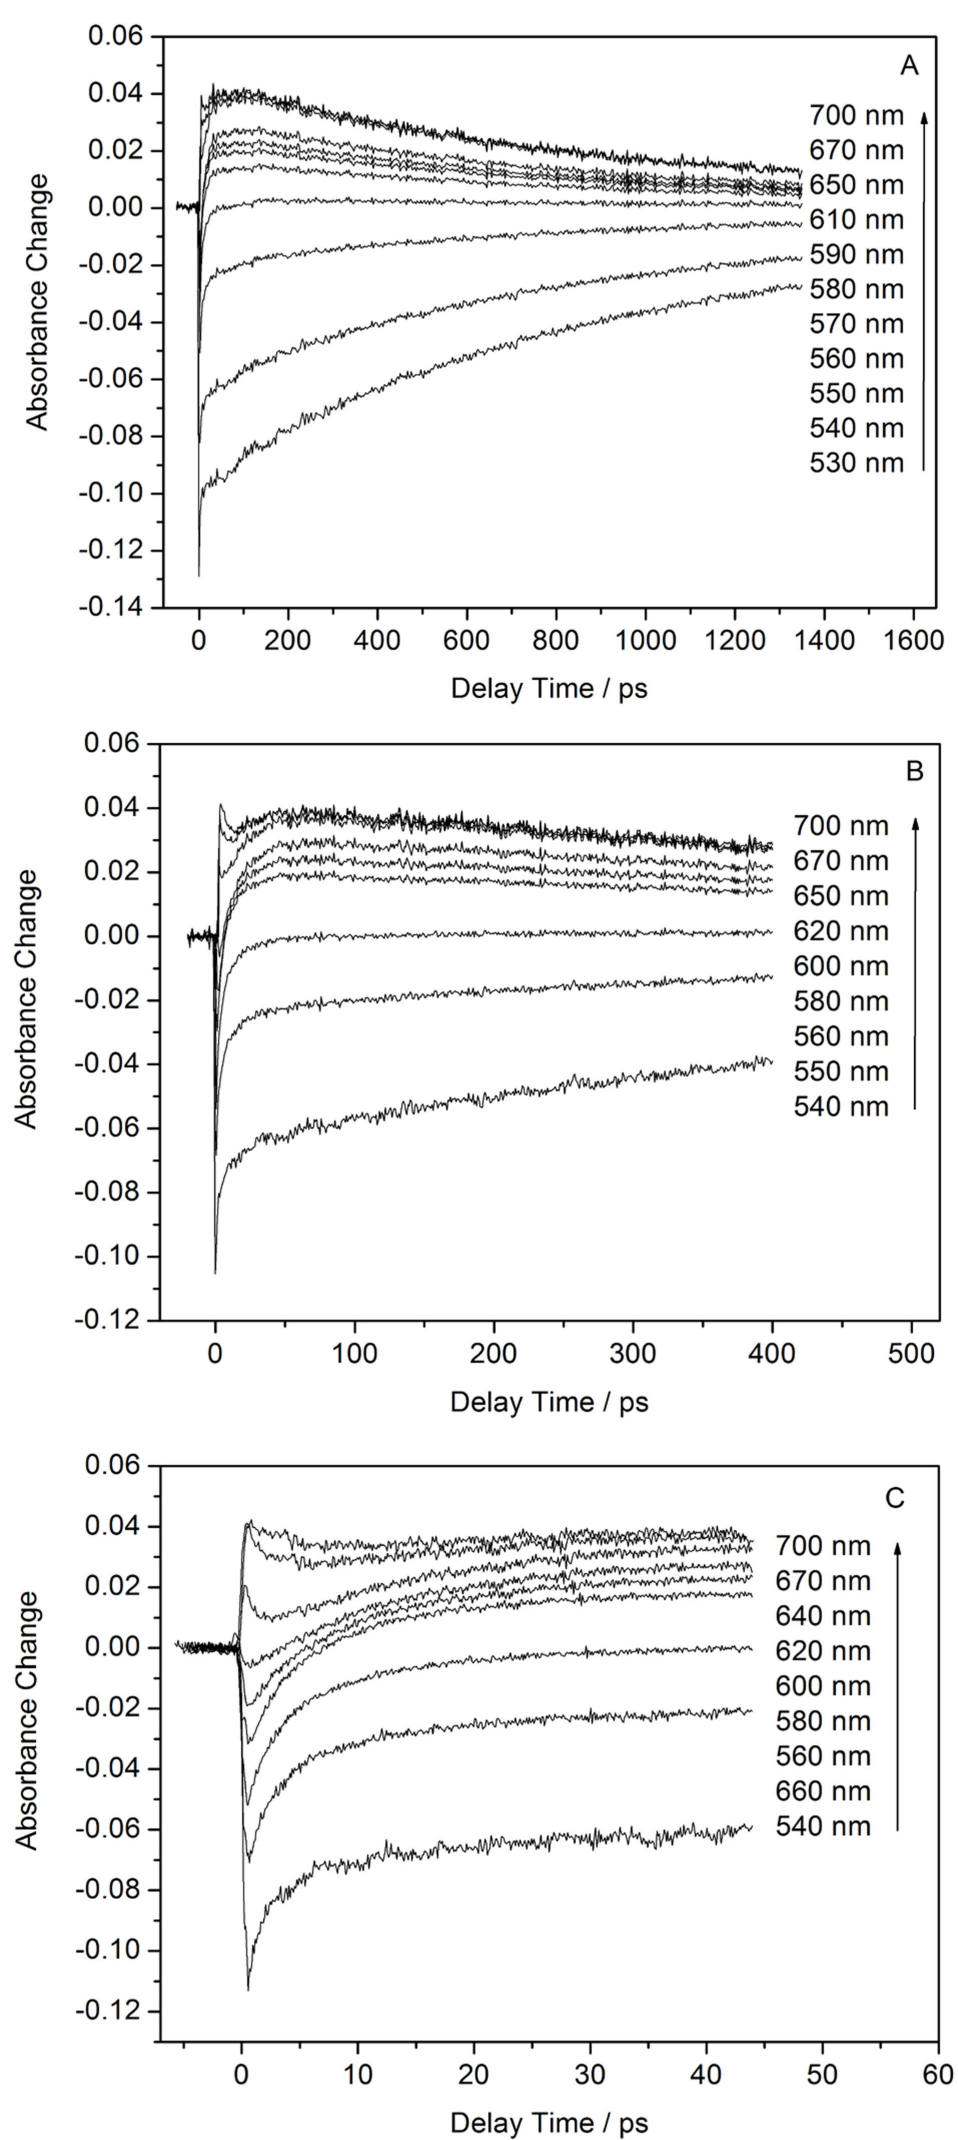

Figure D

Supplement: b409346c.pdf [file b409346c.pdf]
